# Supplementary material for: Eudragit® FS Microparticles Containing Bacteriophages, Prepared by Spray-Drying for Oral Administration
Source: MDPI journal article supplement (doi:10.3390/pharmaceutics15061602), 2023-05-27
Supplement: s1 [file s1]

## Supplementary Material

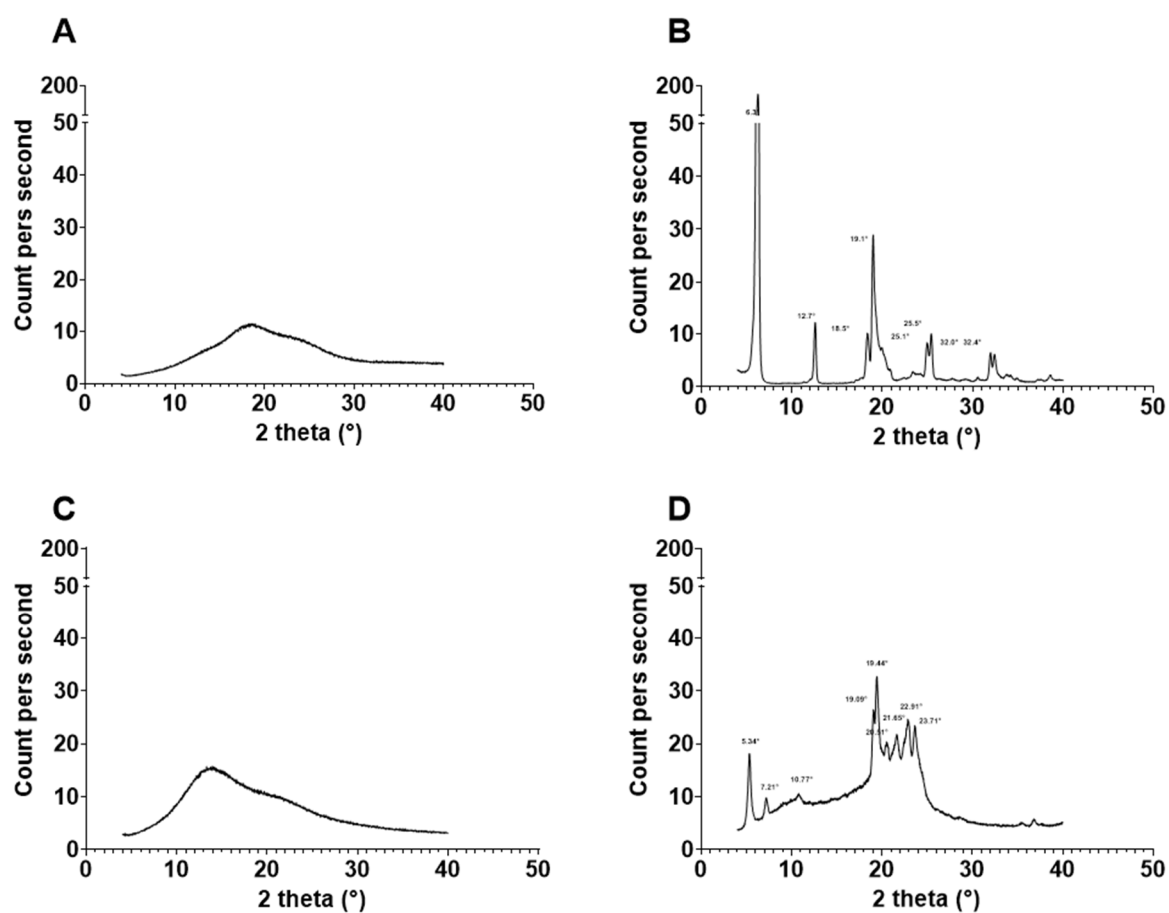

Figure S1. XRD profiles of spray-dried (A): trehalose, (B): L-Isoleucine, (C) Eudragit FS30D and (D) Plasacryl T20.

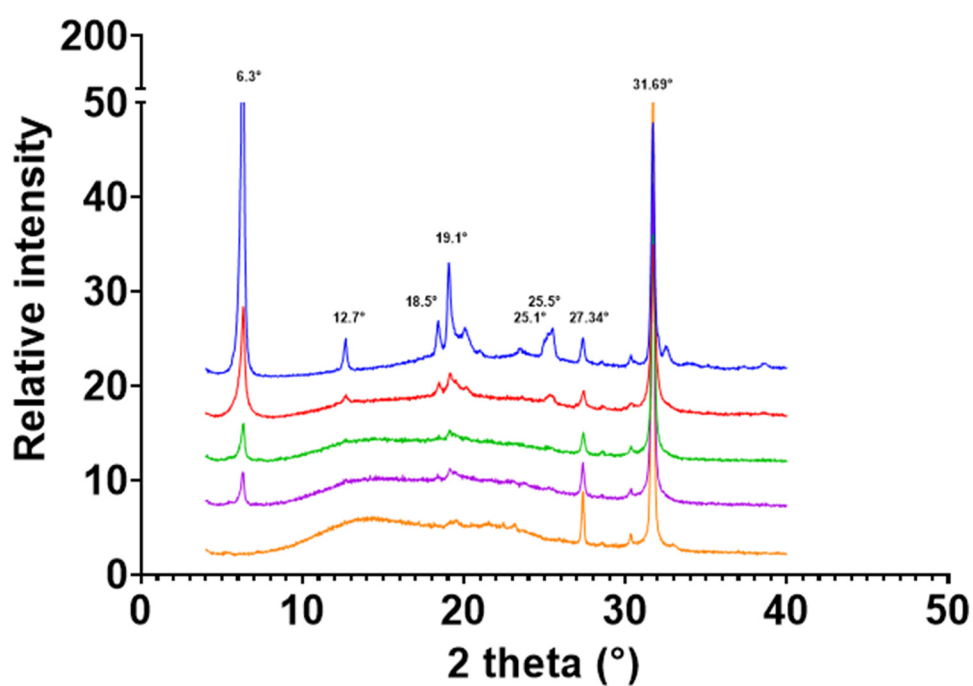

Figure S2. XRD profiles of formulations: F1 (blue), F2 (red), F3 (green), F4 (purple) and F5 (orange).
